# Supplementary material for: Generation of human iPSC line from an arrhythmogenic cardiomyopathy patient with a DSP protein-truncating variant
Source: PubMed Central journal article supplement — Stem Cell Res. Author manuscript; Available in PMC 2023 Feb 6. (PMC9900081; doi:10.1016/j.scr.2022.102987), 2022-11-30

## CYTOGENETIC ANALYSIS REPORT

|                              |                                     |                             |            |
|------------------------------|-------------------------------------|-----------------------------|------------|
| <b>Primary Investigator:</b> | DANIEL YANG, M.D.                   | <b>Cytogenetics Number:</b> | UW-1854    |
| <b>Sample Submitted By:</b>  | DANIEL YANG, M.D.                   | <b>Passage Date:</b>        | 04/11/2020 |
| <b>Cust. Specimen ID:</b>    | DSP-Pt1 iPSC clone #9, passage<br>9 | <b>Received Date:</b>       | 04/16/2020 |
|                              |                                     | <b>Reported Date:</b>       | 04/21/2020 |

**Results: 46,XX[20] ; FEMALE KARYOTYPE**

**INTERPRETATION:** G-banded chromosome analysis of twenty metaphase cells showed a female karyotype without clonal or non-clonal abnormalities.

|                        |    |                       |         |
|------------------------|----|-----------------------|---------|
| Metaphases Counted:    | 20 | Banding Technique:    | G-BANDS |
| Metaphases Analyzed:   | 18 | Banding Level:        | 450-500 |
| Metaphases Karyotyped: | 2  | Cultures Established: | 1       |

We will exercise our best efforts to accurately analyze the chromosome karyotypes of this specimen. However, the level of resolution in this G-banded analysis does not exclude the presence of small structural abnormalities.

Reviewed By:



INDIRA MEHTA, PH.D.

DANIEL YANG, M.D.  
UW YANG LAB  
850 REPUBLICAN ST  
BROTMAN BUILDING ROOM 419  
SEATTLE, WA 98109

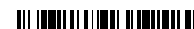

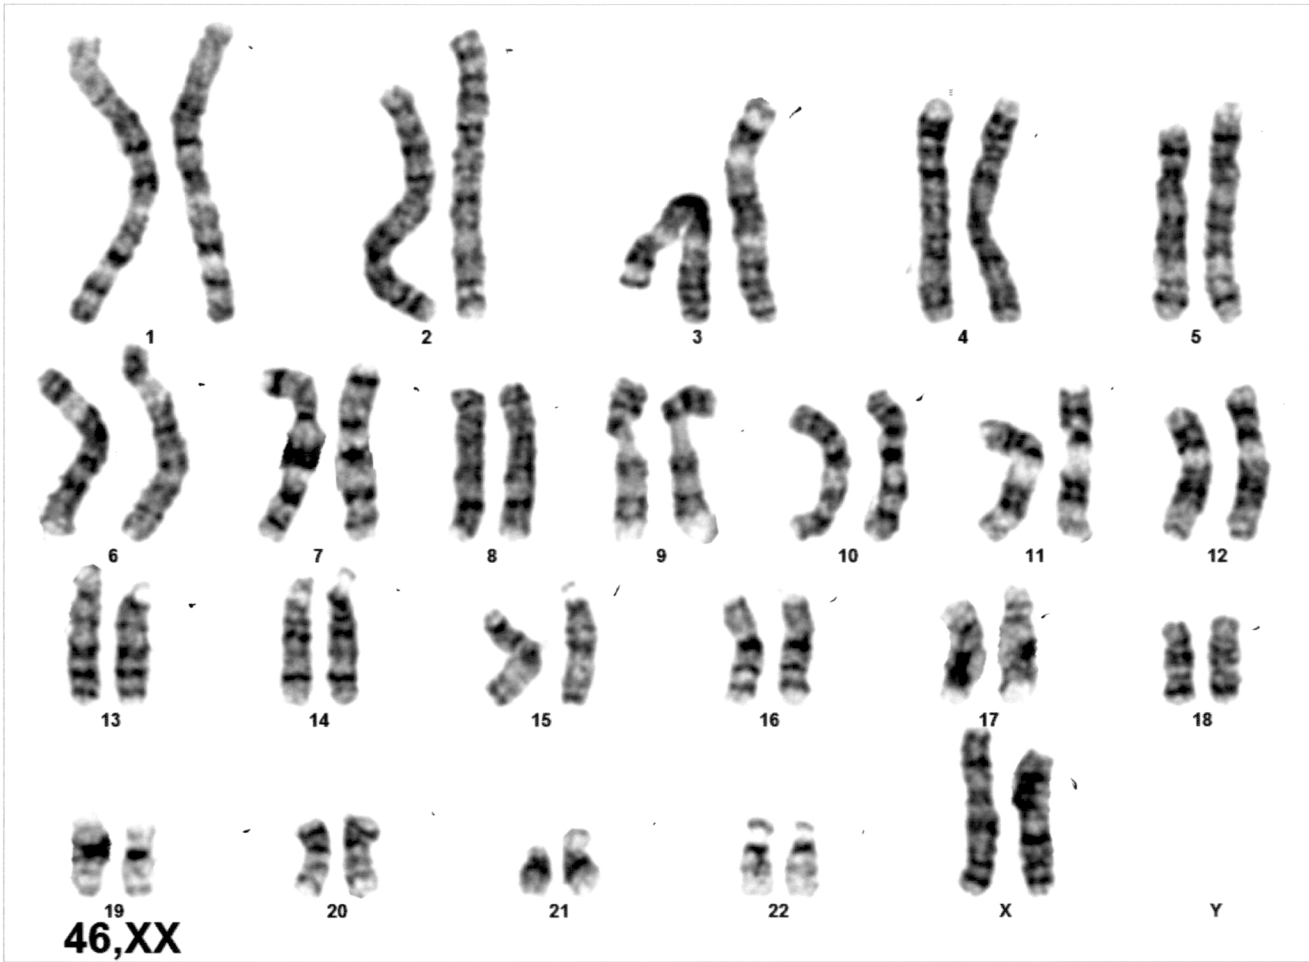

Case: UW-1854-Yh Slide: 2 Cell: 11

Patient name: DSP-Pt1 iPSC clone #9, passage 9

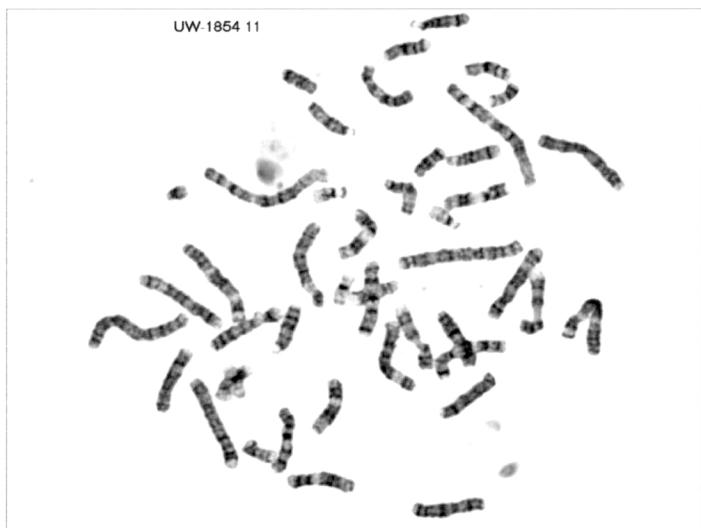

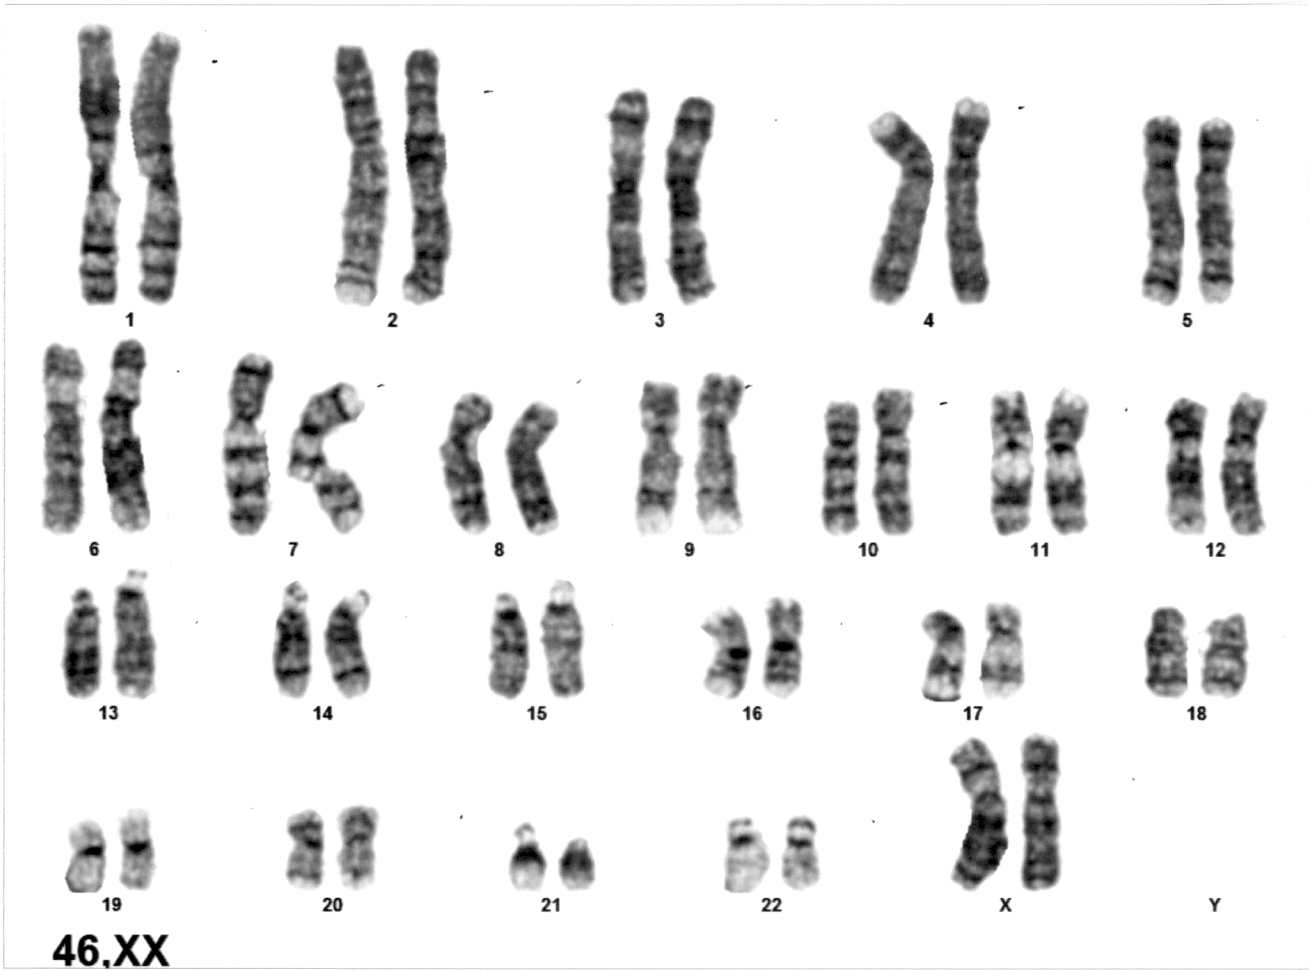

Case: UW-1854-Yh Slide: 1 Cell: 21

Patient name: DSP-Pt1 iPSC clone #9, passage 9

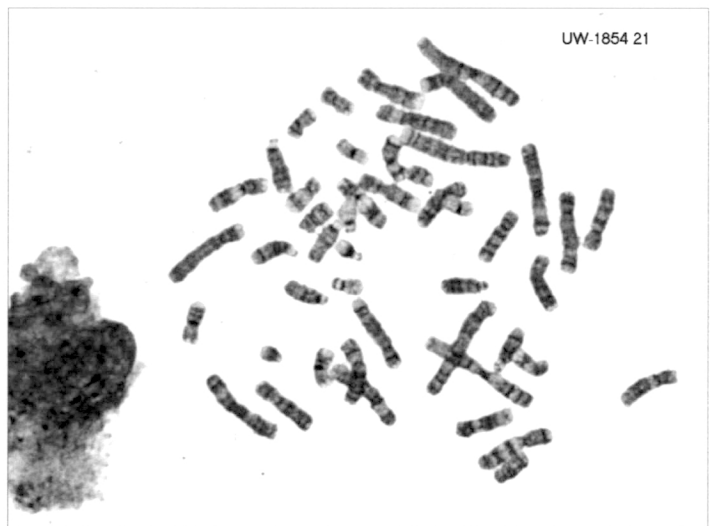

Supplement: NIHMS1864328-supplement-2.pdf [file NIHMS1864328-supplement-2.pdf]
