# Supplementary figures and images for: Generation of human iPSC line from an arrhythmogenic cardiomyopathy patient with a DSP protein-truncating variant
Source: PubMed Central journal article supplement — Stem Cell Res. Author manuscript; Available in PMC 2023 Feb 6. (PMC9900081; doi:10.1016/j.scr.2022.102987), 2022-11-30

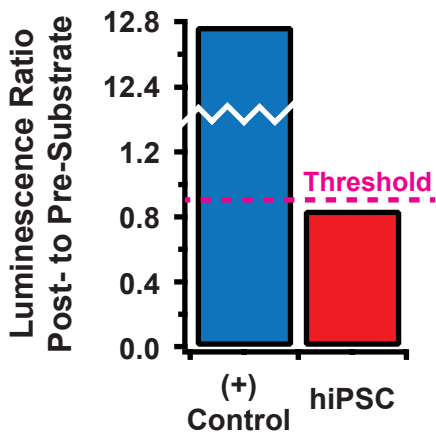

Supplement: NIHMS1864328-supplement-1.pdf [file NIHMS1864328-supplement-1.pdf]
